# Supplementary material for: From tailings to tables: Risk assessment of potentially toxic elements in edible crops cultivated in mine tailing impacted soils
Source: Research Square preprint supplement (doi:10.21203/rs.3.rs-6568816/v1), 2025-05-09
Supplement: Supplementary file 1 [file 9b4755ec78b2e96ee21daf0d.docx]

**Supplementary Material**

**Table S1** – Coordinates of the sites for soil and plant collections at the Rio Doce estuary in decimal degrees.

| Site of collection | Lat | Long |
| --- | --- | --- |
| *Theobroma cacao* | -19.6165 | -39.8235 |
| *Manihot esculenta* | -19.6135 | -39.8223 |
| *Musa spp.* | -19.641 | -39.8233 |

**Table S2** - The potential toxic elements (PTE) for oral reference dose

| **Contaminant** | **RfD (mg/kg-day)** |
| --- | --- |
| Al | 1.0E+00 |
| Ba | 2.0E-01 |
| Cd | 1.0E-03 |
| Cr | 1.5E+00 |
| Co | 3.0E-04 |
| Cu | 4.0E-02 |
| Fe | 7.0E-01 |
| Pba | 3.5E-04 |
| Mn | 1.4E-01 |
| Ni | 2.0E-02 |
| Zn | 3.0E-01 |

aRupert et al. (2004)

**Table S3** - Parameters used to calculate the average daily dose (ADD) for the exposure route for the consumption of *M. esculenta*, *Musa spp.* and *T. cacao*.

| **Parameter Description** |  | **Adults** | **Children** | **Unit** | **Reference** |
| --- | --- | --- | --- | --- | --- |
| *M. esculenta* per capita intake rate | IRm | 0.0045 | 0.0025 | kgfw/day | IBGE, 2020 |
| *Musa spp*. per capita intake rate | IRb | 0.0165 | 0.0186 | kgfw/day | IBGE, 2020 |
| *T. cacao* per capita intake rate | IRc | 0.0088 | 0.0029 | kgfw/day | IBGE, 2020 |
| Exposure duration | ED | 78.5 | 6.0 | years | IBGE, 2018 |
| Exposure frequency | EF | 350 | 350 | day/year | CETESB, 2023 |
| Body mass | BW | 66 | 15.7 | kg | IBGE, 2010 |
| Average Time for non-carcinogenic effects | ATnc | 28653 | 2190 | days | USEPA, 1989 |
| Weight conversion factor from dry base to wet base (M. esculenta) | CFm | 2.48 | | - | USEPA, 2018 |
| Weight conversion factor from dry base to wet base (Musa spp.) | CFb | 5.07 | | - | USEPA, 2018 |
| Weight conversion factor from dry base to wet base (T. cacao) | CFc | 7.34 | | - | Nunes et al., 2020 |

**Table S4.** Geochemical fractionation of potentially toxic elements (PTEs) in soils (mg kg-1) cultivated with *Musa spp*.; *Manihot esculenta* and *Theobroma cacao*.

| PTEs | Specie | EX | CA | FR | LP | OX | PY |
| --- | --- | --- | --- | --- | --- | --- | --- |
| Mn | *Manihot esculenta* | 19.14 | 4.22 | 236.07 | 358.04 | 118.08 | 0.00 |
| *Theobroma cacao* | 16.50 | 4.06 | 236.27 | 326.90 | 85.33 | 0.00 |
| *Musa spp.* | 19.95 | 4.44 | 237.93 | 367.30 | 92.49 | 0.00 |
| Ba | *Manihot esculenta* | 33.23 | 12.52 | 3.27 | 14.02 | 6.08 | 19.27 |
| *Theobroma cacao* | 51.22 | 22.83 | 9.11 | 18.79 | 4.70 | 7.61 |
| *Musa spp.* | 58.24 | 18.31 | 8.39 | 18.88 | 6.05 | 6.76 |
| Cd | *Manihot esculenta* | 0.01 | 0.05 | 0.00 | 0.05 | 0.00 | 0.00 |
| *Theobroma cacao* | 0.01 | 0.07 | 0.02 | 0.07 | 0.17 | 0.00 |
| *Musa spp.* | 0.05 | 0.07 | 0.00 | 0.03 | 0.66 | 0.00 |
| Co | *Manihot esculenta* | 0.27 | 0.18 | 5.05 | 5.26 | 3.02 | 0.16 |
| *Theobroma cacao* | 0.37 | 0.22 | 2.82 | 3.54 | 2.47 | 0.14 |
| *Musa spp.* | 0.17 | 0.10 | 2.19 | 3.38 | 2.50 | 0.25 |
| Cr | *Manihot esculenta* | 0.04 | 0.25 | 0.46 | 4.74 | 18.47 | 0.21 |
| *Theobroma cacao* | 0.02 | 0.04 | 0.26 | 4.66 | 20.36 | 0.01 |
| *Musa spp.* | 0.05 | 0.07 | 0.62 | 4.83 | 23.23 | 0.00 |
| Cu | *Manihot esculenta* | 0.14 | 0.86 | 0.61 | 0.65 | 4.58 | 0.00 |
| *Theobroma cacao* | 0.21 | 0.72 | 0.31 | 1.31 | 1.75 | 0.04 |
| *Musa spp.* | 0.07 | 0.85 | 1.01 | 1.05 | 3.30 | 0.05 |
| Ni | *Manihot esculenta* | 0.22 | 0.00 | 0.02 | 0.05 | 0.47 | 0.55 |
| *Theobroma cacao* | 0.91 | 0.14 | 0.09 | 0.46 | 0.87 | 0.05 |
| *Musa spp.* | 1.04 | 0.21 | 0.00 | 0.54 | 1.18 | 0.07 |
| Pb | *Manihot esculenta* | 1.85 | 2.38 | 0.00 | 7.77 | 3.33 | 5.30 |
| *Theobroma cacao* | 1.25 | 2.57 | 1.06 | 4.58 | 0.95 | 5.94 |
| *Musa spp.* | 0.97 | 2.43 | 0.11 | 7.41 | 2.05 | 4.95 |
| Zn | *Manihot esculenta* | 0.16 | 0.33 | 0.86 | 5.17 | 9.00 | 1.10 |
| *Theobroma cacao* | 0.04 | 0.35 | 1.82 | 8.09 | 8.26 | 0.30 |
| *Musa spp.* | 0.00 | 0.43 | 1.84 | 8.78 | 9.94 | 0.06 |

**Table S5.** Potentially toxic elements threshold in edible parts of plants according to international organizations.

| PTE | Threshold | Reference |
| --- | --- | --- |
| mg kg-1 |
| Cd | 0.05 (fruits) | EC/FAO/WHO |
| 0.1 (tuber) | EC/FAO/WHO |
| Cr | 0.5 - 1.0 | SEPA (2006) |
| Cu | 20.0 | SEPA (2006) |
| Ni | 0.5 - 1.0 | USDA (2018) |
| Pb | 0.8 - 2.3 | EC/FAO/WHO |
| Zn | 50.0 | EC/FAO/WHO |

**
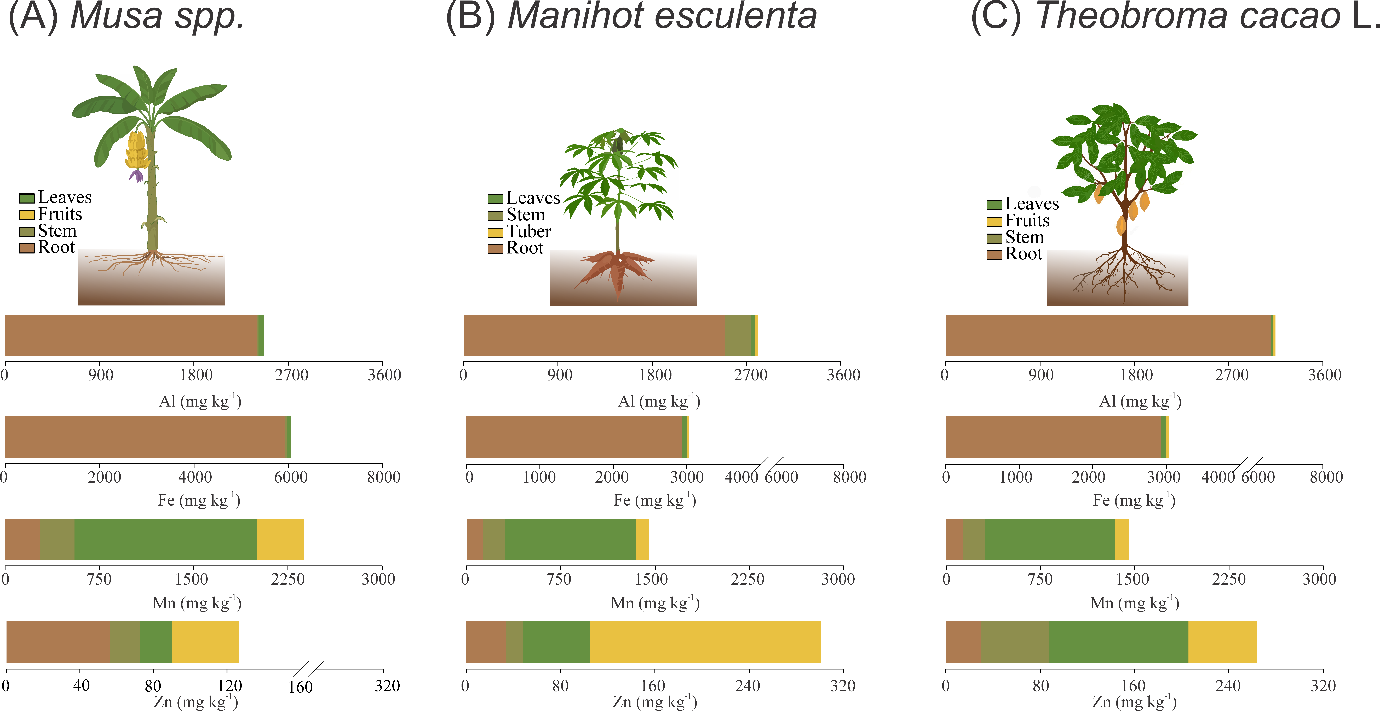
**

**Figure S1.** Major elements (Al, Fe, Mn, and Zn) concentration of (A) *Musa spp.*, (B) *M. esculenta* and (C) *T. cacao* in different plant compartments.


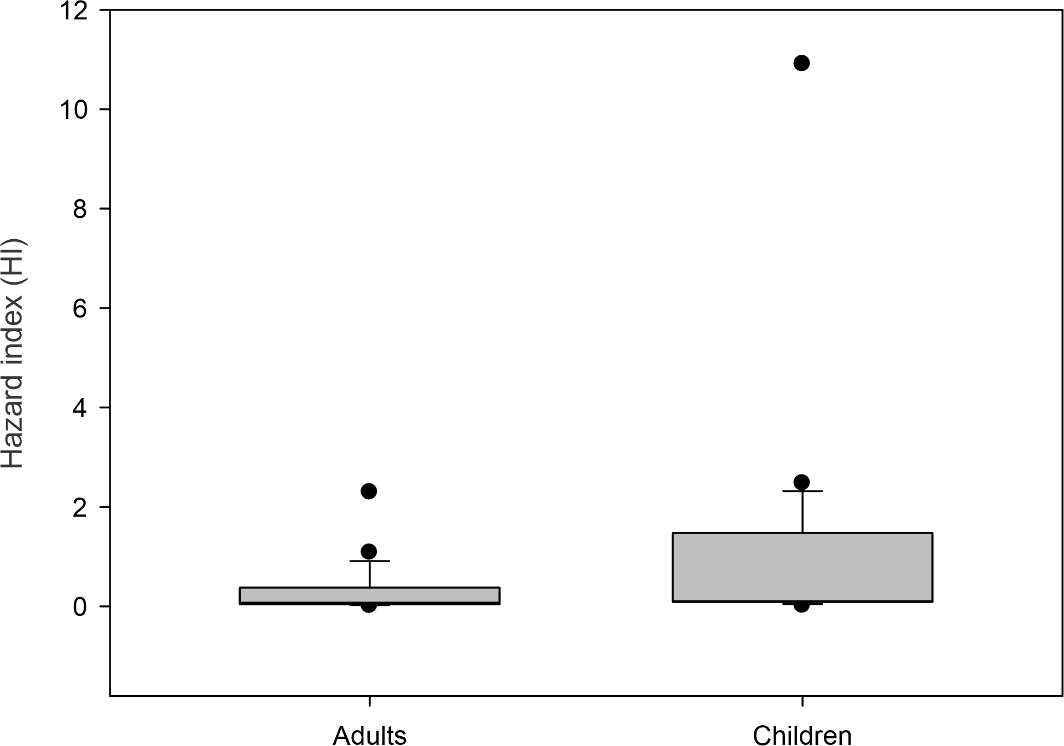


**Figure S2.** Total Hazard Index (THI) for adults and children considering the consumption of food cultivated in a mine tailing impacted soil.


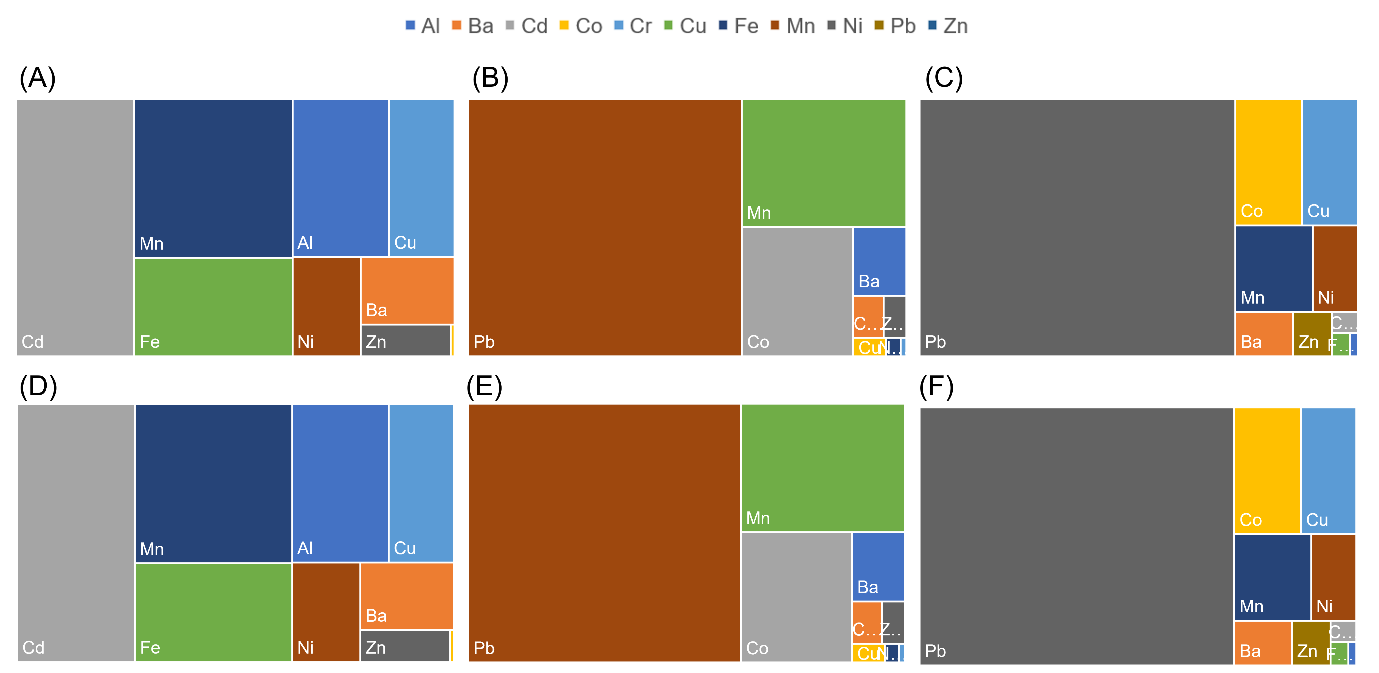


**Figure S3.** Contribution of each element for the Hazard Index (HI) for adults (A, B, and C) and children (D, E, and F), focusing on consuming *M. esculenta* (A, D), *Musa spp.* (B, E), and *T. cacao* (C, F) cultivated in a mine tailing impacted soil.
